# Supplementary material for: Photoinactivation of catalase sensitizes a wide range of bacteria to ROS-producing agents and immune cells
Source: PubMed Central journal article supplement (PMC9220836; doi:10.1172/jci.insight.153079), 2022-05-23
Supplement: jciinsight-7-153079-s084.pdf [file jciinsight-7-153079-s084.pdf]

Supplementary information for manuscript

## **Photoinactivation of Catalase Sensitizes Wide-Ranging Bacteria to ROS-Producing Agents and Immune Cells**

Pu-Ting Dong<sup>1,2,#</sup>, Sebastian Jusuf<sup>1,2,#</sup>, Jie Hui<sup>1,2,#</sup>, Yuewei Zhan<sup>1,2,#</sup>, Yifan Zhu<sup>2,3</sup>, George Y. Liu<sup>4,5</sup>, Ji-Xin Cheng<sup>1,2,3,\*</sup>

<sup>1</sup>Department of Biomedical Engineering, Boston University, Boston, MA02215, USA.

<sup>2</sup>Photonics Center, Boston University, Boston, MA02215, USA.

<sup>3</sup>Department of Chemistry, Boston University, Boston, MA02215, USA.

<sup>4</sup>Division of Pediatric Infectious Diseases and Research Division of Immunology, Department of Biomedical Sciences, Cedars-Sinai Medical Center, Los Angeles, California, USA.

<sup>5</sup>Division of Infectious Diseases, Department of Pediatrics, UCSD, San Diego, California, USA.

\*Corresponding author. Email: [jxcheng@bu.edu](mailto:jxcheng@bu.edu); Phone: (617)-353-1276.

#These authors contributed equally: Pu-Ting Dong, Sebastian Jusuf, Jie Hui, Yuewei Zhan.

### **This file includes:**

Supplementary Figures 1-6

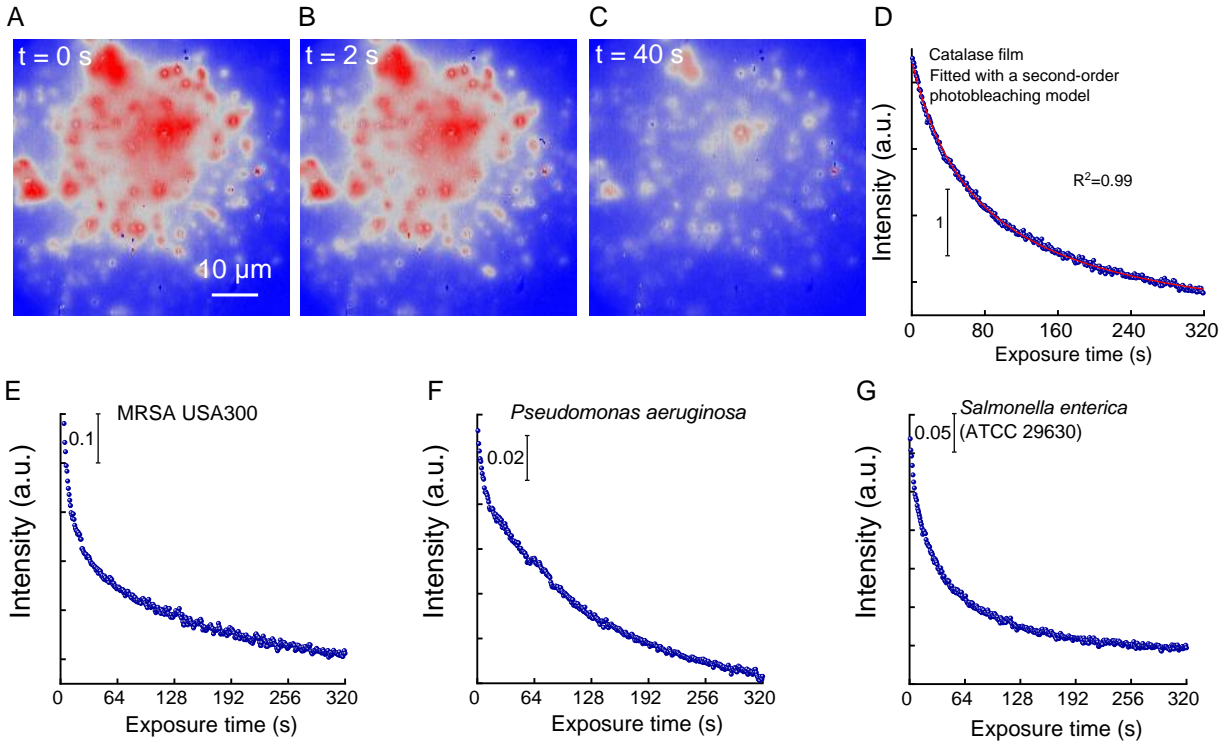

**Supplementary Figure 1. Characterization of photoinactivation of catalase under transient absorption microscope.** **A-C.** Transient absorption images of bovine liver catalase dried on a cover slide under different exposure time. **D.** Time-lapse transient absorption signals of dried bovine liver catalase. Curve fitted by a second-order photobleaching model. **E-G.** Time-lapse transient absorption signals of dried MRSA USA300 (**E**), *P. aeruginosa* (**F**), and *Salmonella enterica* (**G**). Pump=410 nm, 5 mW on the sample; probe=520 nm, 7 mW on the sample. Scalar bar= $10 \mu\text{m}$ .

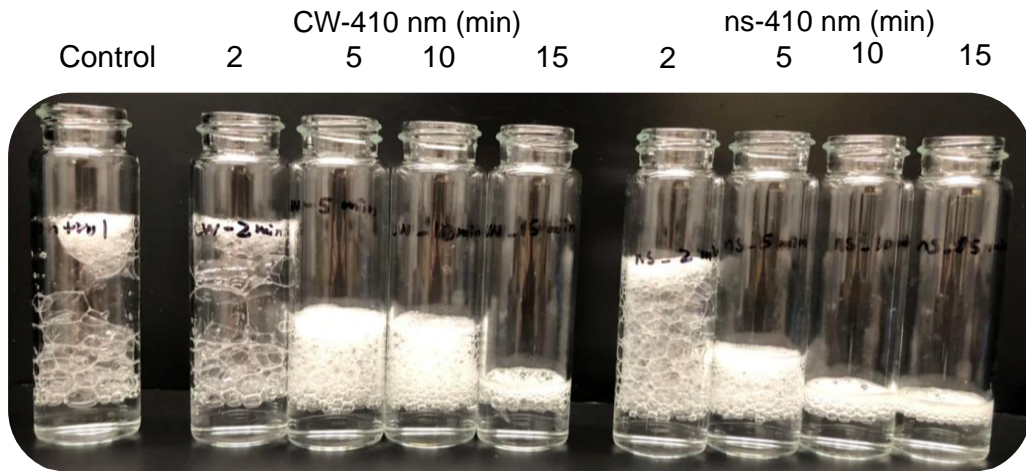

**Supplementary Figure 2. Bubble test comparison between CW-410 nm and ns-410 nm exposure on the capability to inactivate bovine liver catalase. 410 nm: 50 mW/cm<sup>2</sup>.**

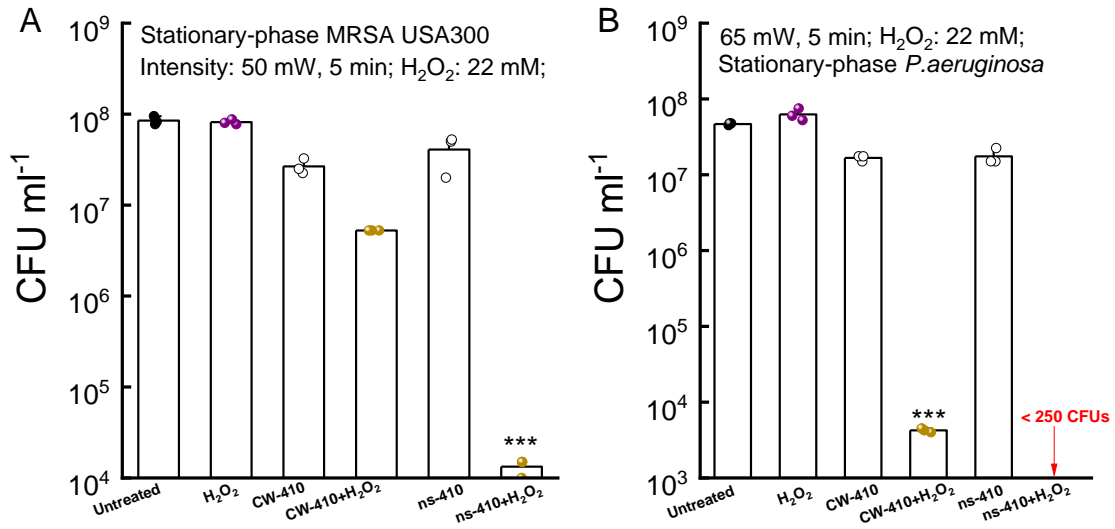

**Supplementary Figure 3. CFU ml<sup>-1</sup> of stationary-phase MRSA USA300 (A) and *P. aeruginosa* PAO1 (B) under CW-410 nm and ns-410 nm treatments. H<sub>2</sub>O<sub>2</sub>: 30-min incubation time. Data: Mean+SD. N=3. Student unpaired *t*-test. \*\*\*: *p*<0.001.**

*E. coli* BW25113

*E. coli*  
 $\Delta$ ahpC

*E. coli*  
 $\Delta$ katG

*E. coli*  
 $\Delta$ katE

*E. coli*  
 $\Delta$ katGE

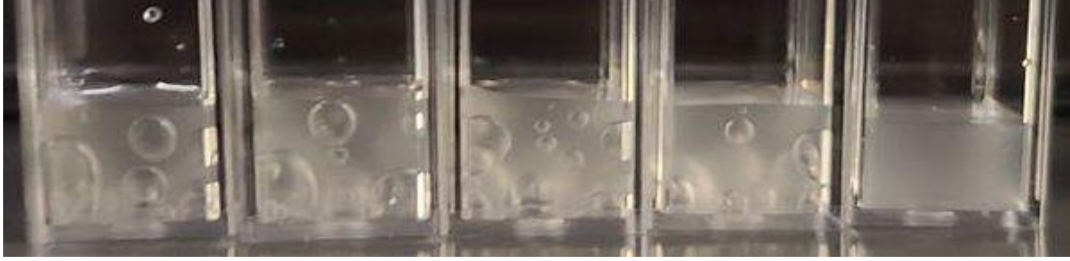

**Supplementary Figure 4. Bubble formation of different *E. coli* strains in the presence of 3% H<sub>2</sub>O<sub>2</sub>.**

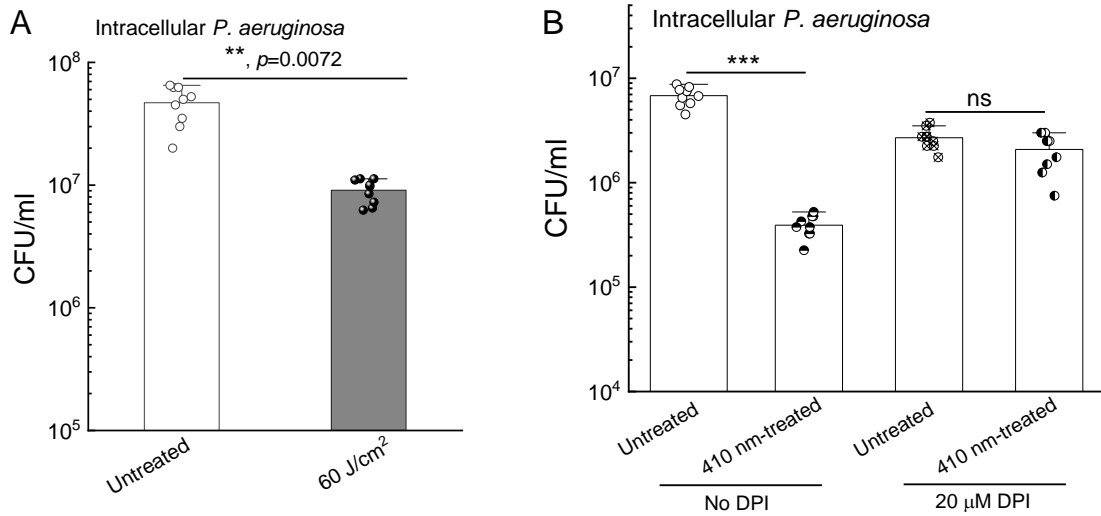

**Supplementary Figure 5. CFU/ml of intracellular *P. aeruginosa* under different treatment schemes.**

**A.** CFU/ml of *P. aeruginosa* after *P. aeruginosa* infected macrophages with/without 410 nm blue light treatment. Dose: 60 J/cm<sup>2</sup>. **B.** CFU/ml of *P. aeruginosa* after untreated and 410 nm-treated *P. aeruginosa* infected macrophages for two hours in the absence/presence of DPI (NOX2 inhibitor). Data: Mean+SD from at least three biological replicates (each biological replicate contains three technical replicates). Significant difference was determined through student unpaired *t*-test. \*\*:  $p < 0.01$ .  $N=3$ .

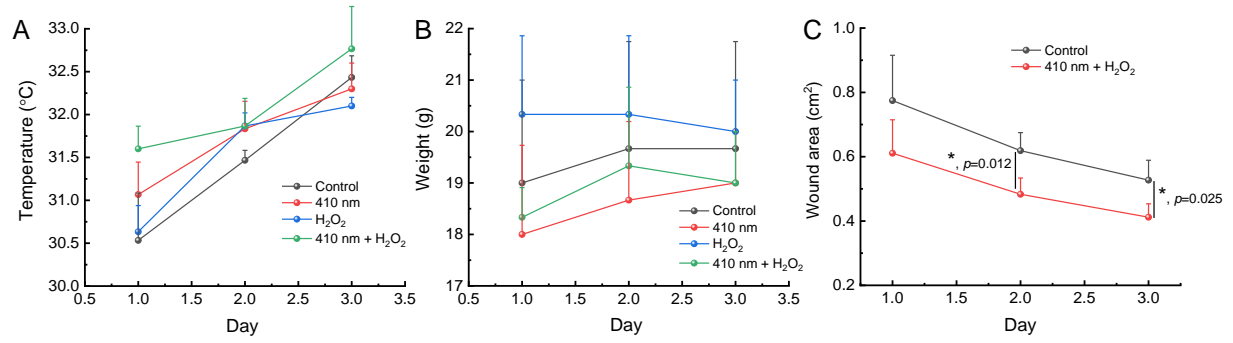

**Supplementary Figure 6. Characterization of mouse physiology in terms of body temperature (A), weight (B), and wound size (C) under different treatment schemes.** Dose: 60 J/cm<sup>2</sup>. H<sub>2</sub>O<sub>2</sub>: 0.5%. Data: Mean±SD from at least three biological replicates. Significant difference was determined through the student unpaired *t*-test. \*: *p*<0.05.
